# Supplementary material for: 10-HDA, A Major Fatty Acid of Royal Jelly, Exhibits pH Dependent Growth-Inhibitory Activity Against Different Strains of Paenibacillus larvae
Source: PubMed Central journal article supplement (PMC6320966; doi:10.3390/molecules23123236), 2018-12-07
Supplement: molecules-23-03236-s001.pdf [file molecules-23-03236-s001.pdf]

## Supplementary materials

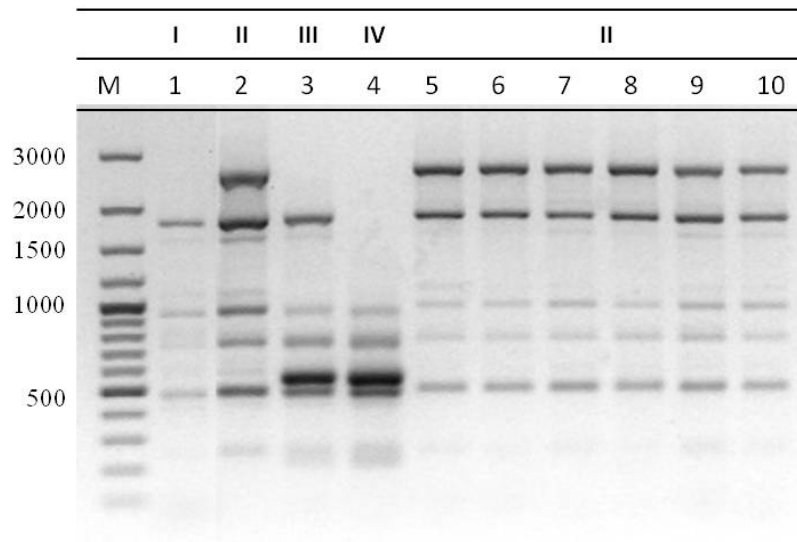

**Figure S1.** ERIC-PCR genotyping of selected *P. larvae* strains. Lane M - 100 bp marker; lanes 1-4 - ERIC I-ERIC IV electrophoretic patterns of reference strains CCUG 28515, CCM 4486, CCM 39 and CCM 38b, respectively; lanes 5-10 - ERIC II patterns of several field isolates. PCR products were analysed on a 1% agarose gel containing GelRed stain.
